# Supplementary material for: Organic acids under pressure: elastic properties, negative mechanical phenomena and pressure induced phase transitions in the lactic, maleic, succinic and citric acids
Source: Royal Society of Chemistry journal article supplement (doi:10.1039/d0ma00019a), 2020-01-01
Supplement: d0ma00019a1.pdf [file d0ma00019a1.pdf]

## SUPPLEMENTARY INFORMATION

Organic acids under pressure: elastic properties, negative  
mechanical phenomena and pressure induced phase  
transitions in the lactic, maleic, succinic and citric acids

*Francisco Colmenero<sup>a\*</sup>*

<sup>a</sup> Instituto de Estructura de la Materia (IEM-CSIC), 28006 Madrid, Spain

\* E-mail: francisco.colmenero@iem.cfmac.csic.es

## Appendix A. First-principles solid-state methods

The crystal structure and mechanical properties of the selected organic acids were modeled employing the Cambridge Serial Total Energy Program (CASTEP),<sup>1</sup> a component of the Materials Studio program suite.<sup>2</sup> The theoretical solid-state treatment employed in this work is based on Periodic Density Functional Theory using large plane wave basis sets and pseudopotential functions to describe the internal atomic electrons.<sup>3</sup> The computations were carried out using the Perdew-Burke-Ernzerhof (PBE) energy-density functional<sup>4</sup> supplemented with Grimme's empirical dispersion correction.<sup>5</sup> The specific pseudopotentials utilized were standard norm-conserving pseudopotentials<sup>6</sup> from CASTEP package. The unit-cell parameters and the associated atomic positions were fully optimized by means of the Broyden-Fletcher-Goldfarb-Shanno (BFGS) technique<sup>7</sup> with a convergence threshold on atomic forces of 0.01 eV/Å. The calculation parameters, the plane wave kinetic energy cutoffs,  $\epsilon$ , and k-point meshes,<sup>8</sup> employed are given in Table S.1 together with the most important material data of the selected organic acids. These calculation parameters were chosen to attain well converged crystal structures, energies and mechanical properties. The X-ray powder diffraction patterns of the considered materials were determined from the computed and experimental crystal structures<sup>9</sup> using the software REFLEX included in Materials Studio package of programs.<sup>2</sup>

The elasticity tensor<sup>10</sup> elements required to calculate the mechanical properties of the materials under consideration and to study the mechanical stability of their crystal structures were determined using the finite deformation method.<sup>11</sup> The computation of the elasticity tensors of these materials was very expensive due to the fact that the required finite structure deformations lead to unsymmetrical crystal structures. The last feature imposes that all the required calculations must be carried out without exploitation of the crystal symmetry. Despite of this difficulty, the deformed crystal structures were optimized with the same convergence parameters as the equilibrium structure.

For each material, the unit-cell volumes in the vicinity of the equilibrium structure were calculated by optimizing the crystal structure under eighteen different external isotropic pressures with values in the range -1.0 to 11.0 GPa. The computed lattice volumes and associated hydrostatic pressures were then adjusted to a 4<sup>th</sup> order Birch-Murnaghan equation of state<sup>12</sup> (BM-EOS) in order to extract the derivatives of the bulk modulus with respect to pressure. Angel's EOSFIT 5.2 code<sup>13-14</sup> was employed for fitting the pressure-volume data to the selected equation of state. The structural optimizations under pressure were also performed using the BFGS method.

The computation of the matrix elements of the elastic tensor and all crystal structure optimizations performed in this work were carried out with stringent convergence tolerances in the variation of the total energy, maximum atomic force, maximum atomic displacement and maximum stress of  $0.5 \times 10^{-5}$  eV/atom, 0.01 eV/Å,  $0.5 \times 10^{-3}$  Å and 0.02 GPa, respectively. These convergence parameters correspond to the standard "hyperfine" optimization in CASTEP. The spatial representations of the elastic properties as a function of the orientation of the applied strain were performed with the EIAM software.<sup>15</sup>

## Appendix B. Mechanical stability conditions for crystals with orthorhombic space symmetry

For crystalline materials having orthorhombic space symmetry, a closed set of necessary and sufficient mechanical stability conditions is known. These conditions are:<sup>16</sup>

$$C_{ii} > 0 \quad (i = 1, 4, 5, 6) \quad (B.1)$$

$$C_{11}C_{22} - C_{12}^2 > 0 \quad (B.2)$$

$$C_{11}C_{22}C_{33} + 2C_{12}C_{13}C_{23} - C_{11}C_{23}^2 - C_{22}C_{13}^2 - C_{33}C_{12}^2 > 0 \quad (B.3)$$

where  $C_{ij}$  are elements of the matrix representation of the elasticity tensor.

**Table S.1.** Material data and calculation parameters.

| Material                | Structural formula     | Crystal system | Space group           | $\varepsilon$ (eV) | k-mesh                |
|-------------------------|------------------------|----------------|-----------------------|--------------------|-----------------------|
| L-(+)-Lactic acid       | $C_3H_6O_3$            | Orthorhombic   | $P2_12_12_1$ (no. 19) | 950                | $5 \times 3 \times 3$ |
| Maleic acid             | $C_4H_4O_4$            | Monoclinic     | $P 2_1/c$ (no. 14)    | 950                | $4 \times 3 \times 4$ |
| Succinic acid           | $C_4H_6O_4$            | Monoclinic     | $P 2_1/c$ (no. 14)    | 950                | $4 \times 3 \times 2$ |
| Citric acid             | $C_6H_8O_7$            | Monoclinic     | $P 2_1/c$ (no. 14)    | 950                | $2 \times 5 \times 3$ |
| Citric acid monohydrate | $C_6H_8O_7 \cdot H_2O$ | Orthorhombic   | $P2_12_12_1$ (no. 19) | 950                | $5 \times 3 \times 2$ |

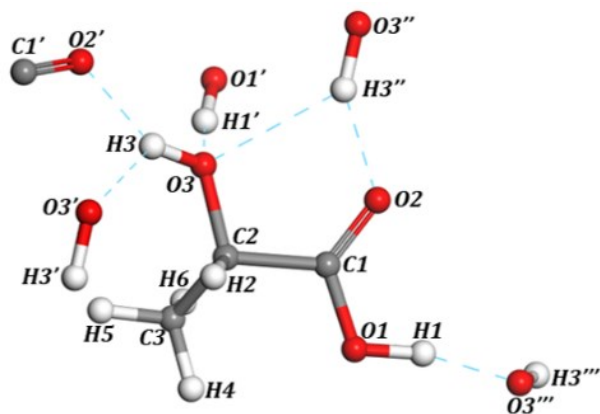

**Fig. S.1.** Atom labelling convention employed for the crystal structure of L-(+)-lactic acid.

**Table S.2.** Interatomic distances in L-(+)-lactic acid (in Å).

| Distance                                                            | Exp. <sup>17</sup> | Calc. |
|---------------------------------------------------------------------|--------------------|-------|
| <b>C-C</b>                                                          |                    |       |
| C1-C2                                                               | 1.519(1)           | 1.527 |
| C2-C3                                                               | 1.521(2)           | 1.531 |
| <b>C-O</b>                                                          |                    |       |
| C1-O2                                                               | 1.208(1)           | 1.228 |
| C1-O1                                                               | 1.320(1)           | 1.323 |
| C2-O3                                                               | 1.425(1)           | 1.425 |
| <b>C-H</b>                                                          |                    |       |
| C2-H2                                                               | 0.96(2)            | 1.101 |
| C3-H4                                                               | 1.02(2)            | 1.098 |
| C3-H5                                                               | 0.96(2)            | 1.097 |
| C3-H6                                                               | 0.98(2)            | 1.098 |
| <b>O-H</b>                                                          |                    |       |
| O1-H1                                                               | 0.79(2)            | 1.029 |
| O3-H3                                                               | 0.82(2)            | 0.994 |
| <b>Hydrogen bonds (O<sub>i</sub>-H<sub>j</sub>...O<sub>k</sub>)</b> |                    |       |
| O1...O3'''                                                          | 2.63               | 2.564 |
| H1...O3'''                                                          | 1.85               | 1.552 |
| O3...O2'                                                            | 2.63               | 2.649 |
| H3...O2'                                                            | 2.00               | 1.745 |
| O3...O3'                                                            | 3.15               | 3.126 |
| H3...O3'                                                            | 2.46               | 2.385 |

**Table S.3.** Interatomic angles in L-(+)-lactic acid (in degrees).

| Angle                                                               | Exp. <sup>17</sup> | Calc.  |
|---------------------------------------------------------------------|--------------------|--------|
| <b>C-C-C</b>                                                        |                    |        |
| C1-C2-C3                                                            | 112.60(9)          | 113.59 |
| <b>O-C-O</b>                                                        |                    |        |
| O1-C1-O2                                                            | 123.9(1)           | 123.84 |
| <b>O-C-C</b>                                                        |                    |        |
| O1-C1-C2                                                            | 111.87(9)          | 112.38 |
| O2-C1-C2                                                            | 124.24(9)          | 123.75 |
| O3-C2-C1                                                            | 106.44(9)          | 107.01 |
| O3-C2-C3                                                            | 111.7(1)           | 112.28 |
| <b>C-O-H</b>                                                        |                    |        |
| C1-O1-H1                                                            | 112(1)             | 111.64 |
| C2-O3-H3                                                            | 110(1)             | 112.75 |
| O3-C2-H2                                                            | 110(1)             | 109.50 |
| <b>H-C-C</b>                                                        |                    |        |
| H2-C2-C1                                                            | 107(1)             | 105.74 |
| H2-C2-C3                                                            | 109(1)             | 108.47 |
| H4-C3-C2                                                            | 107(1)             | 109.79 |
| H5-C3-C2                                                            | 108(1)             | 108.44 |
| H6-C3-C2                                                            | 110(1)             | 110.94 |
| <b>H-C-H</b>                                                        |                    |        |
| H4-C3-H5                                                            | 109(1)             | 109.05 |
| H5-C3-H6                                                            | 109(2)             | 108.97 |
| H6-C3-H4                                                            | 114(1)             | 109.62 |
| <b>Hydrogen bonds (O<sub>i</sub>-H<sub>j</sub>...O<sub>k</sub>)</b> |                    |        |
| O1-H1...O3''                                                        | 168                | 166.59 |
| O3-H3...O2'                                                         | 145                | 149.36 |
| O3-H3...O3'                                                         | 143                | 130.75 |

**Table S.4.** Unit-cell volume and lattice parameters of lactic acid under the effect of different external isotropic pressures.

| <b>P (GPa)</b> | <b>Vol. (<math>\text{\AA}^3</math>)</b> | <b>a (<math>\text{\AA}</math>)</b> | <b>b (<math>\text{\AA}</math>)</b> | <b>c (<math>\text{\AA}</math>)</b> |
|----------------|-----------------------------------------|------------------------------------|------------------------------------|------------------------------------|
| -0.7420        | 461.4547                                | 5.6977                             | 8.4851                             | 9.5450                             |
| -0.4887        | 438.6226                                | 5.5578                             | 8.3828                             | 9.4145                             |
| -0.2519        | 426.7498                                | 5.5072                             | 8.2821                             | 9.3562                             |
| 0.0000         | 421.7510                                | 5.4858                             | 8.2410                             | 9.3290                             |
| 0.2445         | 416.7488                                | 5.4580                             | 8.2105                             | 9.2998                             |
| 0.5074         | 407.5064                                | 5.4147                             | 8.1267                             | 9.2608                             |
| 0.7476         | 401.4066                                | 5.3848                             | 8.1158                             | 9.1851                             |
| 1.0073         | 396.7155                                | 5.3711                             | 8.0874                             | 9.1329                             |
| 1.0258         | 397.2337                                | 5.3508                             | 8.1018                             | 9.1633                             |
| 1.0333         | 366.6874                                | 5.3590                             | 8.6451                             | 7.9148                             |
| 1.0562         | 366.6713                                | 5.3590                             | 8.6450                             | 7.9146                             |
| 1.1798         | 365.0062                                | 5.3525                             | 8.6359                             | 7.8965                             |
| 1.3190         | 361.4192                                | 5.3300                             | 8.6235                             | 7.8633                             |
| 1.4736         | 359.2115                                | 5.3236                             | 8.6109                             | 7.8361                             |
| 1.5301         | 358.9779                                | 5.3220                             | 8.6093                             | 7.8347                             |
| 1.5612         | 356.6913                                | 5.2978                             | 8.6421                             | 7.7908                             |
| 1.5790         | 356.7437                                | 5.2973                             | 8.6427                             | 7.7921                             |
| 1.6668         | 356.4926                                | 5.2971                             | 8.6408                             | 7.7886                             |
| 1.8364         | 353.8676                                | 5.2838                             | 8.6350                             | 7.7560                             |
| 1.9988         | 351.4619                                | 5.2540                             | 8.6224                             | 7.7582                             |
| 2.4980         | 345.1458                                | 5.2048                             | 8.6009                             | 7.7101                             |



**Table S.5.** Interatomic distances (in Å) in Phase II of lactic acid under the external isotropic pressures  $P = 1.5301$  and  $P = 1.5612$  GPa. The third column ( $\Delta$ ) gives the variation of the corresponding distances.

| Distance                                                            | $P = 1.5301$ GPa | $P = 1.5612$ GPa | $\Delta(P = 1.5612 - P = 1.5301)$ |
|---------------------------------------------------------------------|------------------|------------------|-----------------------------------|
| <b>C-C</b>                                                          |                  |                  |                                   |
| C1-C2                                                               | 1.527            | 1.526            | -0.001                            |
| C2-C3                                                               | 1.521            | 1.520            | -0.001                            |
| <b>C-O</b>                                                          |                  |                  |                                   |
| C1-O2                                                               | 1.231            | 1.232            | 0.001                             |
| C1-O1                                                               | 1.317            | 1.318            | 0.001                             |
| C2-O3                                                               | 1.425            | 1.426            | 0.001                             |
| <b>C-H</b>                                                          |                  |                  |                                   |
| C2-H2                                                               | 1.101            | 1.101            | 0.000                             |
| C3-H4                                                               | 1.094            | 1.094            | 0.000                             |
| C3-H5                                                               | 1.093            | 1.094            | 0.001                             |
| C3-H6                                                               | 1.095            | 1.095            | 0.000                             |
| <b>O-H</b>                                                          |                  |                  |                                   |
| O1-H1                                                               | 1.039            | 1.039            | 0.000                             |
| O3-H3                                                               | 0.993            | 0.993            | 0.000                             |
| <b>Hydrogen bonds (O<sub>i</sub>-H<sub>j</sub>...O<sub>k</sub>)</b> |                  |                  |                                   |
| O1...O3'''                                                          | 2.540            | 2.542            | 0.002                             |
| H1...O3'''                                                          | 1.502            | 1.504            | 0.002                             |
| O3...O2'                                                            | 2.568            | 2.570            | 0.002                             |
| H3...O2'                                                            | 1.655            | 1.659            | 0.004                             |

**Table S.6.** Interatomic angles (in degrees) in Phase II of lactic acid under the isotropic pressures  $P = 1.5301$  and  $P = 1.5612$  GPa. The third column ( $\Delta$ ) gives the variation of the corresponding angles.

| Angle                                                               | $P = 1.5301$ GPa | $P = 1.5612$ GPa | $\Delta(P = 1.5612 - P = 1.5301)$ |
|---------------------------------------------------------------------|------------------|------------------|-----------------------------------|
| <b>C-C-C</b>                                                        |                  |                  |                                   |
| C1-C2-C3                                                            | 113.50           | 113.64           | 0.140                             |
| <b>O-C-O</b>                                                        |                  |                  |                                   |
| O1-C1-O2                                                            | 122.78           | 122.78           | 0.000                             |
| <b>O-C-C</b>                                                        |                  |                  |                                   |
| O1-C1-C2                                                            | 114.46           | 114.58           | 0.120                             |
| O2-C1-C2                                                            | 122.74           | 122.62           | -0.120                            |
| O3-C2-C1                                                            | 108.75           | 108.72           | -0.030                            |
| O3-C2-C3                                                            | 109.83           | 109.65           | -0.180                            |
| <b>C-O-H</b>                                                        |                  |                  |                                   |
| C1-O1-H1                                                            | 108.89           | 108.92           | 0.030                             |
| C2-O3-H3                                                            | 114.77           | 114.67           | -0.100                            |
| O3-C2-H2                                                            | 110.01           | 110.00           | -0.010                            |
| <b>H-C-C</b>                                                        |                  |                  |                                   |
| H2-C2-C1                                                            | 105.76           | 105.63           | -0.130                            |
| H2-C2-C3                                                            | 108.91           | 109.10           | 0.190                             |
| H4-C3-C2                                                            | 110.22           | 110.41           | 0.190                             |
| H5-C3-C2                                                            | 108.67           | 108.82           | 0.150                             |
| H6-C3-C2                                                            | 110.21           | 110.03           | -0.180                            |
| <b>H-C-H</b>                                                        |                  |                  |                                   |
| H4-C3-H5                                                            | 108.98           | 108.95           | -0.030                            |
| H5-C3-H6                                                            | 109.31           | 109.26           | -0.050                            |
| H6-C3-H4                                                            | 109.42           | 109.35           | -0.070                            |
| <b>Hydrogen bonds (O<sub>i</sub>-H<sub>j</sub>...O<sub>k</sub>)</b> |                  |                  |                                   |
| O1-H1...O3'''                                                       | 177.60           | 177.41           | -0.190                            |
| O3-H3...O2'                                                         | 150.77           | 150.56           | -0.210                            |

**Table S.7.** Unit-cell volume and lattice parameters of lactic acid under the effect of different external stresses applied in the direction of the minimum Poisson's ratio.

| <b>P (GPa)</b> | <b>Vol. (<math>\text{\AA}^3</math>)</b> | <b><i>a</i> (<math>\text{\AA}</math>)</b> | <b><i>b</i> (<math>\text{\AA}</math>)</b> | <b><i>c</i> (<math>\text{\AA}</math>)</b> |
|----------------|-----------------------------------------|-------------------------------------------|-------------------------------------------|-------------------------------------------|
| -0.2350        | 430.0824                                | 5.5772                                    | 8.3769                                    | 9.2056                                    |
| 0.0000         | 421.7499                                | 5.4858                                    | 8.2410                                    | 9.3290                                    |
| 0.2350         | 413.8439                                | 5.3824                                    | 8.1255                                    | 9.4626                                    |
| 0.4700         | 408.9742                                | 5.3191                                    | 8.0074                                    | 9.6021                                    |
| 0.7050         | 403.8430                                | 5.2516                                    | 7.8402                                    | 9.8083                                    |
| 0.9400         | 400.0177                                | 5.2009                                    | 7.7302                                    | 9.9497                                    |
| 1.4100         | 392.6972                                | 5.0728                                    | 7.5612                                    | 10.2381                                   |
| 1.8800         | 385.3704                                | 4.9307                                    | 7.3546                                    | 10.6270                                   |

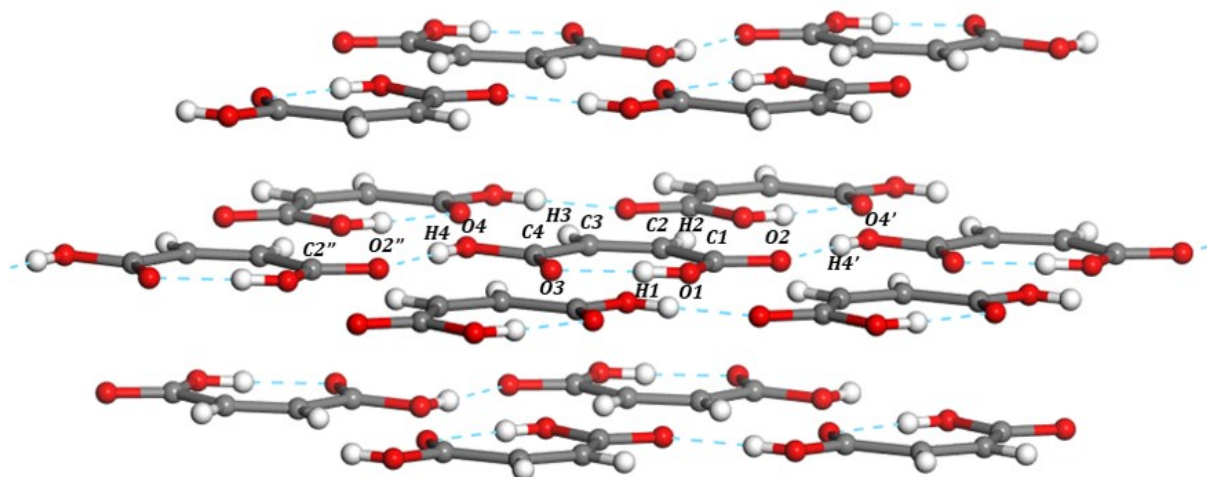

**Fig. S.2.** Atom labelling convention employed for the crystal structure of maleic acid.

**Table S.8.** Interatomic distances in maleic acid (in Å).

| Distance                                                            | Exp. <sup>18</sup> | Calc. |
|---------------------------------------------------------------------|--------------------|-------|
| <b>C-C</b>                                                          |                    |       |
| C1-C2                                                               | 1.482(3)           | 1.490 |
| C2-C3                                                               | 1.323(3)           | 1.349 |
| C3-C4                                                               | 1.470(3)           | 1.482 |
| <b>C-O</b>                                                          |                    |       |
| C1-O2                                                               | 1.213(2)           | 1.243 |
| C1-O1                                                               | 1.307(2)           | 1.313 |
| C4-O3                                                               | 1.223(2)           | 1.248 |
| C4-O4                                                               | 1.304(2)           | 1.313 |
| <b>C-H</b>                                                          |                    |       |
| C2-H2                                                               | 0.930(3)           | 1.091 |
| C3-H3                                                               | 0.93(2)            | 1.092 |
| <b>O-H</b>                                                          |                    |       |
| O1-H1                                                               | 0.82(2)            | 1.049 |
| O4-H4                                                               | 0.82(3)            | 1.030 |
| <b>Hydrogen bonds (O<sub>i</sub>-H<sub>j</sub>...O<sub>k</sub>)</b> |                    |       |
| O1...O3                                                             | 2.50               | 2.471 |
| H1...O3                                                             | 1.68               | 1.427 |
| O4...O2''                                                           | 2.65               | 2.573 |
| H4...O2''                                                           | 1.83               | 1.545 |

**Table S.9.** Interatomic angles in maleic acid (in degrees).

| Angle                                                               | Exp. <sup>18</sup> | Calc.  |
|---------------------------------------------------------------------|--------------------|--------|
| <b>C-C-C</b>                                                        |                    |        |
| C1-C2-C3                                                            | 132.1(2)           | 130.90 |
| C2-C3-C4                                                            | 128.3(2)           | 128.13 |
| <b>O-C-O</b>                                                        |                    |        |
| O1-C1-O2                                                            | 118.6(2)           | 118.70 |
| O3-C4-O4                                                            | 122.4(2)           | 122.40 |
| <b>O-C-C</b>                                                        |                    |        |
| O1-C1-C2                                                            | 121.1(2)           | 121.44 |
| O2-C1-C2                                                            | 120.3(2)           | 119.86 |
| O3-C4-C3                                                            | 124.9(2)           | 124.55 |
| O4-C4-C3                                                            | 112.6(2)           | 113.05 |
| <b>C-O-H</b>                                                        |                    |        |
| C1-O1-H1                                                            | 109.5              | 111.35 |
| C4-O4-H4                                                            | 109.5              | 110.33 |
| <b>H-C-C</b>                                                        |                    |        |
| H2-C2-C1                                                            | 114.0              | 112.62 |
| H2-C2-C3                                                            | 114.0              | 116.48 |
| H3-C3-C2                                                            | 115.8              | 117.32 |
| H3-C3-C4                                                            | 115.8              | 114.55 |
| <b>Hydrogen bonds (O<sub>i</sub>-H<sub>j</sub>...O<sub>k</sub>)</b> |                    |        |
| O1-H1...O3                                                          | 174.7              | 172.74 |
| O4-H4...O2''                                                        | 178.2              | 174.72 |

**Table S.10.** Unit-cell volume and lattice parameters of maleic acid under the effect of different external isotropic pressures.

| P (GPa) | Vol. ( $\text{\AA}^3$ ) | <i>a</i> ( $\text{\AA}$ ) | <i>b</i> ( $\text{\AA}$ ) | <i>c</i> ( $\text{\AA}$ ) | $\beta$ (deg) |
|---------|-------------------------|---------------------------|---------------------------|---------------------------|---------------|
| -0.8006 | 527.3746                | 7.4544                    | 10.3861                   | 8.1015                    | 122.78        |
| -0.7623 | 526.7096                | 7.4521                    | 10.3802                   | 8.0969                    | 122.76        |
| -0.5012 | 484.2005                | 7.0886                    | 10.2796                   | 7.6215                    | 119.32        |
| -0.2481 | 466.4498                | 6.9438                    | 10.1885                   | 7.4757                    | 118.12        |
| -0.0105 | 455.6945                | 6.8630                    | 10.1248                   | 7.3947                    | 117.52        |
| 0.2549  | 446.9222                | 6.7911                    | 10.0824                   | 7.3259                    | 117.00        |
| 0.5112  | 438.5673                | 6.7262                    | 10.0346                   | 7.2621                    | 116.52        |
| 0.7298  | 431.7627                | 6.6721                    | 9.9962                    | 7.2086                    | 116.10        |
| 0.8683  | 427.8133                | 6.6470                    | 9.9718                    | 7.1588                    | 115.63        |
| 0.9376  | 426.4431                | 6.6343                    | 9.9644                    | 7.1516                    | 115.58        |
| 0.9982  | 424.4145                | 6.6245                    | 9.9495                    | 7.1292                    | 115.42        |
| 1.0942  | 422.6135                | 6.6070                    | 9.9400                    | 7.1182                    | 115.31        |
| 1.1586  | 420.1964                | 6.6803                    | 9.9378                    | 6.9826                    | 114.98        |
| 1.2535  | 418.2001                | 6.6767                    | 9.9249                    | 6.9545                    | 114.84        |
| 1.3969  | 415.0499                | 6.6659                    | 9.9044                    | 6.9162                    | 114.64        |
| 1.5017  | 413.2745                | 6.6613                    | 9.8939                    | 6.8913                    | 114.50        |
| 1.6745  | 410.2431                | 6.6612                    | 9.8768                    | 6.8399                    | 114.27        |
| 1.7650  | 408.8448                | 6.6894                    | 9.8659                    | 6.7862                    | 114.10        |
| 1.8152  | 407.6153                | 6.6783                    | 9.8560                    | 6.7835                    | 114.09        |
| 1.8939  | 406.2203                | 6.6552                    | 9.8504                    | 6.7813                    | 113.97        |
| 2.0734  | 403.3437                | 6.6394                    | 9.8124                    | 6.7719                    | 113.90        |
| 2.3035  | 400.0982                | 6.6282                    | 9.8096                    | 6.7124                    | 113.55        |
| 2.3787  | 398.8401                | 6.6274                    | 9.8024                    | 6.6928                    | 113.46        |
| 2.5093  | 397.3673                | 6.6248                    | 9.7953                    | 6.6710                    | 113.37        |
| 2.5783  | 396.0132                | 6.6267                    | 9.7855                    | 6.6484                    | 113.28        |
| 2.6640  | 394.7948                | 6.6558                    | 9.7712                    | 6.6066                    | 113.24        |
| 2.8378  | 392.4459                | 6.6568                    | 9.7519                    | 6.5734                    | 113.12        |
| 3.0097  | 390.4511                | 6.6560                    | 9.7384                    | 6.5454                    | 113.03        |

**Table S.11.** Unit-cell volume and lattice parameters of maleic acid under the effect of different external stresses applied in the direction of the minimum Poisson's ratio.

| <b>P (GPa)</b> | <b>Vol. (<math>\text{\AA}^3</math>)</b> | <b><i>a</i> (<math>\text{\AA}</math>)</b> | <b><i>b</i> (<math>\text{\AA}</math>)</b> | <b><i>c</i> (<math>\text{\AA}</math>)</b> | <b><math>\beta</math> (deg)</b> |
|----------------|-----------------------------------------|-------------------------------------------|-------------------------------------------|-------------------------------------------|---------------------------------|
| -0.0945        | 461.4110                                | 7.5491                                    | 10.1111                                   | 6.8517                                    | 118.08                          |
| -0.0684        | 458.6098                                | 7.1289                                    | 10.1246                                   | 7.1605                                    | 117.46                          |
| -0.0297        | 455.9233                                | 6.8663                                    | 10.1257                                   | 7.3949                                    | 117.53                          |
| -0.0106        | 455.6945                                | 6.8630                                    | 10.1248                                   | 7.3947                                    | 117.52                          |
| 0.0154         | 455.3501                                | 6.8556                                    | 10.1283                                   | 7.3944                                    | 117.52                          |
| 0.0290         | 455.3291                                | 6.8556                                    | 10.1283                                   | 7.3942                                    | 117.52                          |
| 0.0349         | 453.8096                                | 6.8084                                    | 10.1388                                   | 7.4094                                    | 117.47                          |
| 0.0426         | 454.0558                                | 6.7788                                    | 10.1456                                   | 7.4453                                    | 117.53                          |
| 0.0454         | 456.3706                                | 6.6062                                    | 10.1462                                   | 7.7549                                    | 118.60                          |
| 0.0542         | 457.4931                                | 6.4929                                    | 10.1451                                   | 7.9841                                    | 119.55                          |
| 0.0799         | 457.3797                                | 6.4218                                    | 10.1573                                   | 8.1117                                    | 120.18                          |
| 0.0932         | 457.2671                                | 6.4205                                    | 10.1573                                   | 8.1114                                    | 120.18                          |



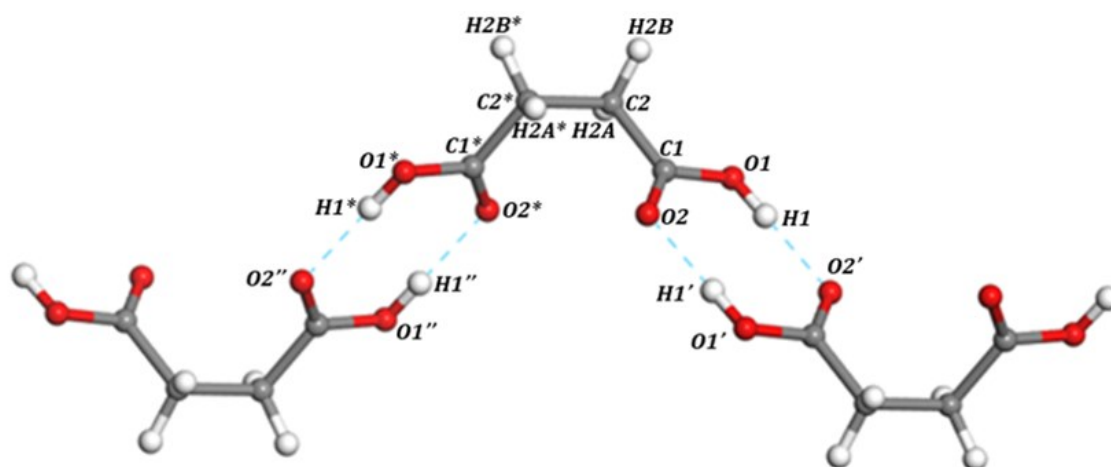

**Fig. S.3.** Atom labelling convention employed for the crystal structure of succinic acid.

**Table S.12.** Interatomic distances in succinic acid (in Å).

| Distance                                                            | Exp. <sup>19</sup> | Calc. |
|---------------------------------------------------------------------|--------------------|-------|
| <b>C-C</b>                                                          |                    |       |
| C1-C2                                                               | 1.497(2)           | 1.507 |
| C2-C2*                                                              | 1.519(3)           | 1.522 |
| <b>C-O</b>                                                          |                    |       |
| C1-O2                                                               | 1.224(2)           | 1.241 |
| C1-O1                                                               | 1.317(2)           | 1.319 |
| <b>C-H</b>                                                          |                    |       |
| C2-H2A                                                              | 0.99(2)            | 1.099 |
| C2-H2B                                                              | 0.99(2)            | 1.101 |
| <b>O-H</b>                                                          |                    |       |
| O1-H1                                                               | 0.90(2)            | 1.026 |
| <b>Hydrogen bonds (O<sub>i</sub>-H<sub>j</sub>...O<sub>k</sub>)</b> |                    |       |
| O1...O2'                                                            | 2.24               | 2.256 |
| H1...O2'                                                            | 1.77               | 1.570 |

**Table S.13.** Interatomic angles in succinic acid (in degrees).

| Angle                                                               | Exp. <sup>19</sup> | Calc.  |
|---------------------------------------------------------------------|--------------------|--------|
| <b>C-C-C</b>                                                        |                    |        |
| C1-C2-C2*                                                           | 113.17(12)         | 113.56 |
| <b>O-C-O</b>                                                        |                    |        |
| O1-C1-O2                                                            | 123.18(15)         | 123.54 |
| <b>O-C-C</b>                                                        |                    |        |
| O1-C1-C2                                                            | 112.74(13)         | 113.22 |
| O2-C1-C2                                                            | 124.08(14)         | 123.24 |
| <b>C-O-H</b>                                                        |                    |        |
| C1-O1-H1                                                            | 111.50(12)         | 111.25 |
| <b>H-C-C</b>                                                        |                    |        |
| H2A-C2-C1                                                           | 108.9              | 107.65 |
| H2A-C2-C2*                                                          | 108.9              | 111.97 |
| H2B-C2-C1                                                           | 108.9              | 106.34 |
| H2B-C2-C2*                                                          | 108.9              | 110.69 |
| <b>H-C-H</b>                                                        |                    |        |
| H2A-C2-H2B                                                          | 107.8              | 106.20 |
| <b>Hydrogen bonds (O<sub>i</sub>-H<sub>j</sub>...O<sub>k</sub>)</b> |                    |        |
| O1-H1...O2'                                                         | 177.6              | 175.74 |

**Table S.14.** Unit-cell volume and lattice parameters of succinic acid under the effect of different external isotropic pressures.

| P (GPa) | Vol. ( $\text{\AA}^3$ ) | <i>a</i> ( $\text{\AA}$ ) | <i>b</i> ( $\text{\AA}$ ) | <i>c</i> ( $\text{\AA}$ ) | $\beta$ (deg) |
|---------|-------------------------|---------------------------|---------------------------|---------------------------|---------------|
| -0.7576 | 515.9252                | 5.8566                    | 8.3037                    | 10.6134                   | 91.68         |
| -0.4929 | 497.4526                | 5.7654                    | 8.2039                    | 10.5179                   | 90.67         |
| -0.2557 | 484.9889                | 5.6949                    | 8.1507                    | 10.4484                   | 89.97         |
| -0.0102 | 477.4754                | 5.6594                    | 8.1169                    | 10.3944                   | 89.62         |
| 0.2432  | 471.4804                | 5.6383                    | 8.0785                    | 10.3516                   | 89.35         |
| 0.3628  | 466.2306                | 5.6076                    | 8.0523                    | 10.3269                   | 88.98         |
| 0.5118  | 461.4479                | 5.6001                    | 8.0101                    | 10.2894                   | 88.77         |
| 0.6364  | 457.9564                | 5.6005                    | 7.9777                    | 10.2530                   | 88.60         |
| 0.7521  | 454.7242                | 5.6058                    | 7.9373                    | 10.2233                   | 88.47         |
| 0.8564  | 452.2302                | 5.6058                    | 7.9133                    | 10.1987                   | 88.36         |
| 0.9204  | 450.8201                | 5.5953                    | 7.9110                    | 10.1893                   | 88.28         |
| 1.0568  | 447.8577                | 5.5897                    | 7.8871                    | 10.1640                   | 88.14         |
| 1.1351  | 446.0917                | 5.5869                    | 7.8721                    | 10.1490                   | 88.01         |
| 1.1788  | 445.7026                | 5.5780                    | 7.8778                    | 10.1489                   | 88.02         |
| 1.2536  | 444.0519                | 5.5719                    | 7.8684                    | 10.1350                   | 87.93         |
| 1.3324  | 442.4902                | 5.5747                    | 7.8512                    | 10.1171                   | 87.83         |
| 1.3632  | 441.5836                | 5.5762                    | 7.8412                    | 10.1067                   | 87.81         |
| 1.5212  | 439.4051                | 5.5572                    | 7.8408                    | 10.0927                   | 87.67         |
| 1.6250  | 437.2665                | 5.5537                    | 7.8260                    | 10.0696                   | 87.58         |
| 1.7506  | 435.1598                | 5.5493                    | 7.8093                    | 10.0514                   | 87.45         |
| 1.8759  | 433.2097                | 5.5388                    | 7.8009                    | 10.0371                   | 87.34         |
| 1.9941  | 431.1431                | 5.5400                    | 7.7776                    | 10.0180                   | 87.21         |
| 2.0838  | 429.9725                | 5.5411                    | 7.7667                    | 10.0033                   | 87.15         |
| 2.1448  | 429.2847                | 5.5304                    | 7.7733                    | 9.9986                    | 87.11         |
| 2.1820  | 428.5386                | 5.5323                    | 7.7618                    | 9.9928                    | 87.08         |
| 2.2432  | 427.3665                | 5.5337                    | 7.7525                    | 9.9752                    | 87.04         |
| 2.5002  | 423.9550                | 5.5193                    | 7.7321                    | 9.9494                    | 86.84         |
| 2.7385  | 420.6623                | 5.5105                    | 7.7101                    | 9.9181                    | 86.64         |

**Table S.15.** Unit-cell volume and lattice parameters of succinic acid under the effect of different external stresses applied in the direction of the minimum Poisson's ratio.

| P (GPa) | Vol. ( $\text{\AA}^3$ ) | a ( $\text{\AA}$ ) | b ( $\text{\AA}$ ) | c ( $\text{\AA}$ ) | $\beta$ (deg) |
|---------|-------------------------|--------------------|--------------------|--------------------|---------------|
| -0.5007 | 505.0031                | 5.4983             | 8.4091             | 10.9282            | 91.89         |
| -0.2444 | 486.7118                | 5.6525             | 8.1830             | 10.5226            | 90.21         |
| -0.0101 | 477.4754                | 5.6594             | 8.1169             | 10.3944            | 89.62         |
| 0.2415  | 466.2120                | 5.7335             | 7.9838             | 10.1883            | 88.52         |
| 0.4985  | 459.6942                | 5.8325             | 7.8946             | 9.9895             | 88.02         |
| 0.5647  | 457.9056                | 5.8508             | 7.8746             | 9.9457             | 87.86         |
| 0.6113  | 456.6210                | 5.8656             | 7.8588             | 9.9134             | 87.76         |
| 0.6903  | 455.2336                | 5.8992             | 7.8322             | 9.8611             | 87.63         |
| 0.7456  | 453.9666                | 5.9234             | 7.8125             | 9.8191             | 87.52         |
| 0.8097  | 452.8322                | 5.9508             | 7.7922             | 9.7756             | 87.41         |
| 0.8680  | 451.5115                | 5.9660             | 7.7760             | 9.7433             | 87.31         |
| 0.9374  | 450.4890                | 5.9835             | 7.7606             | 9.7125             | 87.25         |
| 0.9905  | 449.7059                | 6.0005             | 7.7467             | 9.6861             | 87.19         |
| 1.0783  | 447.5038                | 6.0355             | 7.7175             | 9.6203             | 87.04         |
| 1.1283  | 447.3805                | 6.0354             | 7.7165             | 9.6190             | 87.04         |
| 1.1755  | 447.1988                | 6.0353             | 7.7151             | 9.6170             | 87.04         |
| 1.2435  | 445.1574                | 6.0371             | 7.6996             | 9.5903             | 86.95         |
| 1.3208  | 444.9526                | 6.0368             | 7.6978             | 9.5886             | 86.95         |
| 1.4036  | 449.4863                | 6.3589             | 7.5659             | 9.3484             | 87.99         |
| 1.5051  | 469.7676                | 8.1412             | 6.5638             | 8.9497             | 100.80        |
| 1.6285  | 466.2057                | 13.7380            | 4.7524             | 8.2590             | 120.16        |
| 1.7567  | 462.0475                | 14.2903            | 4.7968             | 8.2721             | 125.43        |
| 1.9055  | 459.5100                | 14.3349            | 4.7818             | 8.2412             | 125.57        |
| 1.9864  | 458.9763                | 14.5162            | 4.8043             | 8.1340             | 125.99        |
| 2.5014  | 449.4902                | 14.5495            | 4.7559             | 8.0756             | 126.45        |
| 2.9980  | 442.9805                | 14.7432            | 4.7263             | 8.0087             | 127.46        |

**Table S.16.** Interatomic distances (in Å) in succinic acid under the external stresses with  $P = 1.404$  and  $P = 1.757$  GPa applied in the direction of the minimum Poisson's ratio. The third column ( $\Delta$ ) gives the variation of the corresponding distances.

| Distance                                                            | $P = 1.404$ GPa | $P = 1.757$ GPa | $\Delta(P = 1.757 - P = 1.404)$ |
|---------------------------------------------------------------------|-----------------|-----------------|---------------------------------|
| <b>C-C</b>                                                          |                 |                 |                                 |
| C1-C2                                                               | 1.501           | 1.503           | 0.002                           |
| C2-C2*                                                              | 1.519           | 1.523           | 0.004                           |
| <b>C-O</b>                                                          |                 |                 |                                 |
| C1-O2                                                               | 1.241           | 1.239           | -0.002                          |
| C1-O1                                                               | 1.315           | 1.317           | 0.002                           |
| <b>C-H</b>                                                          |                 |                 |                                 |
| C2-H2A                                                              | 1.098           | 1.100           | 0.002                           |
| C2-H2B                                                              | 1.099           | 1.095           | -0.004                          |
| <b>O-H</b>                                                          |                 |                 |                                 |
| O1-H1                                                               | 1.030           | 1.026           | -0.004                          |
| <b>Hydrogen bonds (O<sub>i</sub>-H<sub>j</sub>...O<sub>k</sub>)</b> |                 |                 |                                 |
| O1...O2'                                                            | 2.256           | 2.250           | -0.006                          |
| H1...O2'                                                            | 1.539           | 1.556           | 0.017                           |

**Table S.17.** Interatomic angles (in deg.) in succinic acid under the external stresses with P=1.404 and P=1.757 GPa applied in the direction of the minimum Poisson's ratio. The third column ( $\Delta$ ) gives the variation of the corresponding distances.

| Angle                                                               | P = 1.5301 GPa | P = 1.5612 GPa | $\Delta(P = 1.5612 - P = 1.5301)$ |
|---------------------------------------------------------------------|----------------|----------------|-----------------------------------|
| <b>C-C-C</b>                                                        |                |                |                                   |
| C1-C2-C2*                                                           | 113.54         | 113.04         | -0.500                            |
| <b>O-C-O</b>                                                        |                |                |                                   |
| O1-C1-O2                                                            | 123.93         | 123.29         | -0.640                            |
| <b>O-C-C</b>                                                        |                |                |                                   |
| O1-C1-C2                                                            | 113.21         | 114.76         | 1.550                             |
| O2-C1-C2                                                            | 122.86         | 121.95         | -0.910                            |
| <b>C-O-H</b>                                                        |                |                |                                   |
| C1-O1-H1                                                            | 111.41         | 110.06         | -1.350                            |
| <b>H-C-C</b>                                                        |                |                |                                   |
| H2A-C2-C1                                                           | 107.03         | 107.06         | 0.030                             |
| H2A-C2-C2*                                                          | 112.04         | 111.74         | -0.300                            |
| H2B-C2-C1                                                           | 106.82         | 108.45         | 1.630                             |
| H2B-C2-C2*                                                          | 111.06         | 110.41         | -0.650                            |
| <b>H-C-H</b>                                                        |                |                |                                   |
| H2A-C2-H2B                                                          | 105.90         | 105.81         | -0.090                            |
| <b>Hydrogen bonds (O<sub>i</sub>-H<sub>j</sub>...O<sub>k</sub>)</b> |                |                |                                   |
| O1-H1...O2'                                                         | 175.95         | 172.95         | -3.000                            |

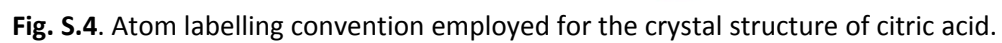



**Table S.18.** Interatomic distances in citric acid (in Å).

| Distance                                                            | Exp. <sup>20</sup> | Calc. |
|---------------------------------------------------------------------|--------------------|-------|
| <b>C-C</b>                                                          |                    |       |
| C1-C2                                                               | 1.497              | 1.509 |
| C2-C3                                                               | 1.544              | 1.550 |
| C3-C4                                                               | 1.532              | 1.544 |
| C3-C6                                                               | 1.535              | 1.547 |
| C4-C5                                                               | 1.508              | 1.513 |
| <b>C-O</b>                                                          |                    |       |
| C1-O2                                                               | 1.239              | 1.239 |
| C1-O1                                                               | 1.298              | 1.318 |
| C3-O7                                                               | 1.407              | 1.411 |
| C6-O6                                                               | 1.202              | 1.223 |
| C6-O5                                                               | 1.316              | 1.321 |
| C5-O4                                                               | 1.210              | 1.233 |
| C5-O3                                                               | 1.310              | 1.324 |
| <b>C-H</b>                                                          |                    |       |
| C2-H1                                                               | 0.994              | 1.098 |
| C2-H2                                                               | 0.931              | 1.102 |
| C4-H3                                                               | 0.986              | 1.099 |
| C4-H4                                                               | 0.980              | 1.097 |
| <b>O-H</b>                                                          |                    |       |
| O1-H5                                                               | 1.070              | 1.036 |
| O7-H8                                                               | 0.840              | 0.979 |
| O5-H7                                                               | 0.922              | 1.008 |
| O3-H6                                                               | 0.892              | 0.999 |
| <b>Hydrogen bonds (O<sub>i</sub>-H<sub>j</sub>...O<sub>k</sub>)</b> |                    |       |
| O1...O2'                                                            | 2.234              | 2.253 |
| H5...O2'                                                            | 1.549              | 1.517 |
| O7...O2                                                             | 2.867              | 2.907 |
| H8...O2                                                             | 2.415              | 2.418 |
| O7...O1'                                                            | 2.867              | 2.809 |
| H8...O1'                                                            | 2.145              | 1.939 |
| O7...O6                                                             | 2.700              | 2.717 |
| H8...O6                                                             | 2.294              | 2.302 |
| O5...O4'                                                            | 2.745              | 2.641 |
| H7...O4'                                                            | 1.825              | 1.639 |
| O3...O6'                                                            | 2.676              | 2.601 |
| H6...O6'                                                            | 1.906              | 1.672 |

**Table S.19.** Interatomic angles in citric acid (in degrees).

| Angle                                                               | Exp. <sup>20</sup> | Calc.  |
|---------------------------------------------------------------------|--------------------|--------|
| <b>C-C-C</b>                                                        |                    |        |
| C1-C2-C3                                                            | 116.19             | 116.13 |
| C2-C3-C4                                                            | 107.86             | 107.22 |
| C2-C3-C6                                                            | 110.79             | 109.63 |
| C3-C4-C5                                                            | 112.03             | 112.13 |
| <b>O-C-O</b>                                                        |                    |        |
| O1-C1-O2                                                            | 123.41             | 123.56 |
| O6-C6-O5                                                            | 124.46             | 124.93 |
| O3-C5-O4                                                            | 122.91             | 122.51 |
| <b>O-C-C</b>                                                        |                    |        |
| O1-C1-C2                                                            | 114.11             | 113.01 |
| O2-C1-C2                                                            | 122.48             | 123.43 |
| O5-C6-C3                                                            | 112.48             | 113.29 |
| O6-C6-C3                                                            | 123.06             | 121.76 |
| O7-C3-C2                                                            | 112.06             | 111.95 |
| O7-C3-C4                                                            | 106.38             | 106.80 |
| O7-C3-C6                                                            | 109.91             | 110.34 |
| O3-C5-C4                                                            | 111.40             | 111.74 |
| O4-C5-C4                                                            | 125.69             | 125.76 |
| <b>C-O-H</b>                                                        |                    |        |
| C1-O1-H5                                                            | 114.39             | 111.91 |
| C6-O5-H7                                                            | 111.00             | 110.10 |
| C3-O7-H8                                                            | 105.78             | 109.08 |
| C5-O3-H6                                                            | 106.89             | 113.01 |
| <b>H-C-C</b>                                                        |                    |        |
| H1-C2-C1                                                            | 108.90             | 108.81 |
| H1-C2-C3                                                            | 111.21             | 111.10 |
| H2-C2-C1                                                            | 104.65             | 106.25 |
| H2-C2-C3                                                            | 109.06             | 107.93 |
| H3-C4-C3                                                            | 111.90             | 110.07 |
| H3-C4-C5                                                            | 106.86             | 109.15 |
| H4-C4-C3                                                            | 109.38             | 109.09 |
| H4-C4-C5                                                            | 108.52             | 108.66 |
| <b>H-C-H</b>                                                        |                    |        |
| H1-C2-H2                                                            | 106.18             | 106.04 |
| H3-C4-H4                                                            | 108.01             | 107.63 |
| <b>Hydrogen bonds (O<sub>i</sub>-H<sub>j</sub>...O<sub>k</sub>)</b> |                    |        |
| O1-H5...O2'                                                         | 176.97             | 175.57 |
| O7-H8...O2                                                          | 114.55             | 110.33 |
| O7-H8...O1'                                                         | 142.02             | 146.79 |
| O7-H8...O6                                                          | 110.04             | 104.46 |
| O5-H7...O4'                                                         | 175.47             | 172.54 |
| O3-H6...O6'                                                         | 143.51             | 152.80 |

**Table S.20.** Unit-cell volume and lattice parameters of citric acid under the effect of different external isotropic pressures.

| P (GPa) | Vol. ( $\text{\AA}^3$ ) | <i>a</i> ( $\text{\AA}$ ) | <i>b</i> ( $\text{\AA}$ ) | <i>c</i> ( $\text{\AA}$ ) | $\beta$ (deg) |
|---------|-------------------------|---------------------------|---------------------------|---------------------------|---------------|
| -0.9994 | 854.3956                | 13.2217                   | 5.7494                    | 11.8940                   | 109.10        |
| -0.7464 | 806.8623                | 13.0243                   | 5.6781                    | 11.6549                   | 110.59        |
| -0.6078 | 780.5403                | 12.8242                   | 5.6438                    | 11.5740                   | 111.29        |
| -0.4998 | 771.0575                | 12.8174                   | 5.6174                    | 11.5107                   | 111.51        |
| -0.3710 | 759.1084                | 12.8376                   | 5.5785                    | 11.4251                   | 111.91        |
| -0.2456 | 747.8182                | 12.8254                   | 5.5469                    | 11.3479                   | 112.13        |
| -0.1387 | 747.0323                | 12.8209                   | 5.5450                    | 11.3438                   | 112.13        |
| -0.0047 | 746.1776                | 12.8179                   | 5.5423                    | 11.3389                   | 112.13        |
| 0.1382  | 745.0446                | 12.8094                   | 5.5404                    | 11.3334                   | 112.13        |
| 0.2518  | 740.0845                | 12.7819                   | 5.5281                    | 11.3147                   | 112.23        |
| 0.3627  | 737.8923                | 12.7736                   | 5.5224                    | 11.3022                   | 112.25        |
| 0.4914  | 720.1391                | 12.5559                   | 5.4903                    | 11.2994                   | 112.55        |
| 0.6242  | 714.5465                | 12.5167                   | 5.4789                    | 11.2751                   | 112.46        |
| 0.7523  | 710.8851                | 12.5015                   | 5.4730                    | 11.2472                   | 112.52        |
| 1.0021  | 701.2255                | 12.4265                   | 5.4579                    | 11.2008                   | 112.62        |
| 1.4961  | 687.0800                | 12.3545                   | 5.4241                    | 11.1259                   | 112.85        |
| 2.0057  | 675.1925                | 12.2857                   | 5.3961                    | 11.0732                   | 113.11        |
| 2.5248  | 664.7628                | 12.2257                   | 5.3653                    | 11.0431                   | 113.41        |

**Table S.21.** Unit-cell volume and lattice parameters of citric acid under the effect of different external stresses applied in the direction of the minimum Poisson's ratio.

| <b>P (GPa)</b> | <b>Vol. (<math>\text{\AA}^3</math>)</b> | <b><i>a</i> (<math>\text{\AA}</math>)</b> | <b><i>b</i> (<math>\text{\AA}</math>)</b> | <b><i>c</i> (<math>\text{\AA}</math>)</b> | <b><math>\beta</math> (deg)</b> |
|----------------|-----------------------------------------|-------------------------------------------|-------------------------------------------|-------------------------------------------|---------------------------------|
| -0.2671        | 763.8238                                | 12.2063                                   | 5.7190                                    | 11.7948                                   | 111.92                          |
| -0.1333        | 754.9968                                | 12.4962                                   | 5.6201                                    | 11.5933                                   | 111.98                          |
| -0.0029        | 746.0548                                | 12.8142                                   | 5.5431                                    | 11.3391                                   | 112.14                          |
| 0.0888         | 739.1102                                | 12.9195                                   | 5.4930                                    | 11.2419                                   | 112.11                          |
| 0.1163         | 740.2504                                | 12.9548                                   | 5.4904                                    | 11.2230                                   | 111.98                          |
| 0.1613         | 750.2413                                | 13.7599                                   | 5.4320                                    | 10.8533                                   | 112.36                          |
| 0.1675         | 750.2131                                | 13.7601                                   | 5.4319                                    | 10.8530                                   | 112.36                          |
| 0.2307         | 744.7074                                | 13.8248                                   | 5.4063                                    | 10.7833                                   | 112.48                          |
| 0.4026         | 735.9923                                | 14.1897                                   | 5.3484                                    | 10.4925                                   | 112.44                          |
| 0.5364         | 732.3052                                | 14.3272                                   | 5.3138                                    | 10.3821                                   | 112.11                          |
| 0.6600         | 729.2900                                | 14.5853                                   | 5.2734                                    | 10.2265                                   | 112.00                          |
| 0.7931         | 727.4684                                | 14.7980                                   | 5.2449                                    | 10.1044                                   | 111.94                          |

**Table S.22.** Interatomic distances (in Å) in citric acid under the external stresses with P=0.1163 and P=0.1613 GPa applied in the direction of the minimum Poisson's ratio. The third column ( $\Delta$ ) gives the variation of the corresponding distances.

| Distance                                                            | P=0.1163 GPa | P=0.1613 GPa   | $\Delta(P=0.1613 - P=0.1163)$ |
|---------------------------------------------------------------------|--------------|----------------|-------------------------------|
| <b>C-C</b>                                                          |              |                |                               |
| C1-C2                                                               | 1.508        | 1.503          | -0.005                        |
| C2-C3                                                               | 1.549        | 1.545          | -0.004                        |
| C3-C4                                                               | 1.543        | 1.554          | 0.011                         |
| C3-C6                                                               | 1.547        | 1.550          | 0.003                         |
| C4-C5                                                               | 1.513        | 1.512          | -0.001                        |
| <b>C-O</b>                                                          |              |                |                               |
| C1-O2                                                               | 1.239        | 1.241          | 0.002                         |
| C1-O1                                                               | 1.317        | 1.316          | -0.001                        |
| C3-O7                                                               | 1.410        | 1.408          | -0.002                        |
| C6-O6                                                               | 1.223        | 1.225          | 0.002                         |
| C6-O5                                                               | 1.321        | 1.318          | -0.003                        |
| C5-O4                                                               | 1.233        | 1.234          | 0.001                         |
| C5-O3                                                               | 1.324        | 1.325          | 0.001                         |
| <b>C-H</b>                                                          |              |                |                               |
| C2-H1                                                               | 1.098        | 1.098          | 0.000                         |
| C2-H2                                                               | 1.102        | 1.100          | -0.002                        |
| C4-H3                                                               | 1.098        | 1.097          | -0.001                        |
| C4-H4                                                               | 1.097        | 1.097          | 0.000                         |
| <b>O-H</b>                                                          |              |                |                               |
| O1-H5                                                               | 1.037        | 1.045          | 0.008                         |
| O7-H8                                                               | 0.980        | 0.981          | 0.001                         |
| O5-H7                                                               | 1.008        | 1.015          | 0.007                         |
| O3-H6                                                               | 0.999        | 0.998          | -0.001                        |
| <b>Hydrogen bonds (O<sub>i</sub>-H<sub>j</sub>...O<sub>k</sub>)</b> |              |                |                               |
| O1...O2'                                                            | 2.253        | 2.255          | 0.002                         |
| H5...O2'                                                            | 1.508        | 1.482          | -0.026                        |
| O7...O2                                                             | 2.901        | 2.983 (broken) | 0.082                         |
| H8...O2                                                             | 2.408        | 2.527 (broken) | 0.119                         |
| O7...O1'                                                            | 2.794        | 2.753          | -0.041                        |
| H8...O1'                                                            | 1.914        | 1.844          | -0.070                        |
| O7...O6                                                             | 2.717        | 2.732          | 0.015                         |
| H8...O6                                                             | 2.301        | 2.352          | 0.051                         |
| O5...O4'                                                            | 2.646        | 2.599          | -0.047                        |
| H7...O4'                                                            | 1.644        | 1.596          | -0.048                        |
| O3...O6'                                                            | 2.605        | 2.639          | 0.034                         |
| H6...O6'                                                            | 1.677        | 1.722          | 0.045                         |

**Table S.23.** Interatomic angles (in degrees) in citric acid under the external stresses with  $P=0.1163$  and  $P=0.1613$  GPa applied in the direction of the minimum Poisson's ratio. The third column ( $\Delta$ ) gives the variation of the corresponding distances.

| Angle                                                               | P=0.1163 GPa | P=0.1613 GPa    | $\Delta(P=0.1613 - P=0.1163)$ |
|---------------------------------------------------------------------|--------------|-----------------|-------------------------------|
| <b>C-C-C</b>                                                        |              |                 |                               |
| C1-C2-C3                                                            | 115.95       | 115.44          | -0.510                        |
| C2-C3-C4                                                            | 107.15       | 106.21          | -0.940                        |
| C2-C3-C6                                                            | 111.12       | 109.30          | -1.820                        |
| C3-C4-C5                                                            | 112.36       | 113.20          | 0.840                         |
| <b>O-C-O</b>                                                        |              |                 |                               |
| O1-C1-O2                                                            | 123.61       | 123.74          | 0.130                         |
| O6-C6-O5                                                            | 124.92       | 125.46          | 0.540                         |
| O3-C5-O4                                                            | 122.64       | 122.63          | -0.010                        |
| <b>O-C-C</b>                                                        |              |                 |                               |
| O1-C1-C2                                                            | 113.06       | 113.38          | 0.320                         |
| O2-C1-C2                                                            | 123.33       | 122.88          | -0.450                        |
| O5-C6-C3                                                            | 113.22       | 111.93          | -1.290                        |
| O6-C6-C3                                                            | 121.84       | 122.61          | 0.770                         |
| O7-C3-C2                                                            | 111.88       | 111.91          | 0.030                         |
| O7-C3-C4                                                            | 106.83       | 107.45          | 0.620                         |
| O7-C3-C6                                                            | 110.37       | 111.10          | 0.730                         |
| O3-C5-C4                                                            | 111.60       | 111.89          | 0.290                         |
| O4-C5-C4                                                            | 125.76       | 125.47          | -0.290                        |
| <b>C-O-H</b>                                                        |              |                 |                               |
| C1-O1-H5                                                            | 112.13       | 113.30          | 1.170                         |
| C6-O5-H7                                                            | 109.96       | 111.59          | 1.630                         |
| C3-O7-H8                                                            | 108.94       | 109.44          | 0.500                         |
| C5-O3-H6                                                            | 113.33       | 113.81          | 0.480                         |
| <b>H-C-C</b>                                                        |              |                 |                               |
| H1-C2-C1                                                            | 108.62       | 107.55          | -1.070                        |
| H1-C2-C3                                                            | 111.26       | 111.07          | -0.190                        |
| H2-C2-C1                                                            | 106.42       | 107.31          | 0.890                         |
| H2-C2-C3                                                            | 107.92       | 108.41          | 0.490                         |
| H3-C4-C3                                                            | 110.10       | 109.40          | -0.700                        |
| H3-C4-C5                                                            | 109.21       | 109.07          | -0.140                        |
| H4-C4-C3                                                            | 108.96       | 108.62          | -0.340                        |
| H4-C4-C5                                                            | 108.47       | 108.31          | -0.160                        |
| <b>H-C-H</b>                                                        |              |                 |                               |
| H1-C2-H2                                                            | 106.12       | 106.65          | 0.530                         |
| H3-C4-H4                                                            | 107.62       | 108.12          | 0.500                         |
| <b>Hydrogen bonds (O<sub>i</sub>-H<sub>j</sub>...O<sub>k</sub>)</b> |              |                 |                               |
| O1-H5...O2'                                                         | 175.91       | 175.33          | -0.580                        |
| O7-H8...O2                                                          | 110.59       | 108.28 (broken) | -2.310                        |
| O7-H8...O1'                                                         | 148.14       | 152.73          | 4.590                         |
| O7-H8...O6                                                          | 104.55       | 102.10          | -2.450                        |
| O5-H7...O4'                                                         | 172.64       | 168.69          | -3.950                        |
| O3-H6...O6'                                                         | 151.23       | 150.91          | -0.320                        |

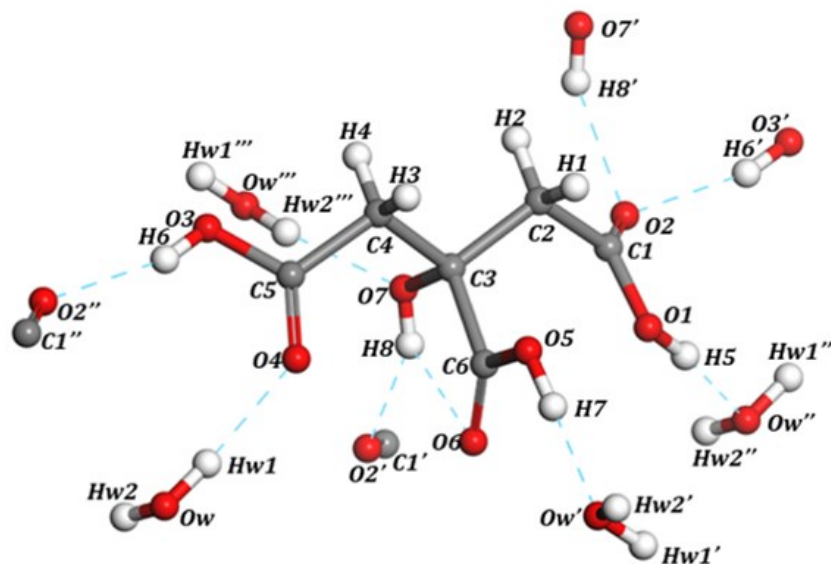

**Fig. S.5.** Atom labelling convention employed for the crystal structure of citric acid monohydrate.

**Table S.24.** Interatomic distances in citric acid monohydrate (in Å).

| Distance                                                            | Exp. <sup>21</sup> | Calc. |
|---------------------------------------------------------------------|--------------------|-------|
| <b>C-C</b>                                                          |                    |       |
| C1-C2                                                               | 1.506              | 1.511 |
| C2-C3                                                               | 1.546              | 1.556 |
| C3-C4                                                               | 1.532              | 1.538 |
| C3-C6                                                               | 1.539              | 1.549 |
| C4-C6                                                               | 1.507              | 1.512 |
| <b>C-O</b>                                                          |                    |       |
| C1-O2                                                               | 1.221              | 1.242 |
| C1-O1                                                               | 1.316              | 1.314 |
| C3-O7                                                               | 1.421              | 1.426 |
| C6-O6                                                               | 1.210              | 1.216 |
| C6-O5                                                               | 1.325              | 1.331 |
| C5-O4                                                               | 1.214              | 1.229 |
| C5-O3                                                               | 1.326              | 1.331 |
| <b>C-H</b>                                                          |                    |       |
| C2-H1                                                               | 0.978              | 1.099 |
| C2-H2                                                               | 0.974              | 1.096 |
| C4-H3                                                               | 0.927              | 1.098 |
| C4-H4                                                               | 0.960              | 1.096 |
| <b>O-H</b>                                                          |                    |       |
| O1-H5                                                               | 0.864              | 1.037 |
| O7-H8                                                               | 0.785              | 0.990 |
| O5-H7                                                               | 0.891              | 1.014 |
| O3-H6                                                               | 0.828              | 1.001 |
| <b>Water</b>                                                        |                    |       |
| Ow-Hw1                                                              | 0.863              | 0.996 |
| Ow-Hw2                                                              | 0.858              | 0.999 |
| <b>Hydrogen bonds (O<sub>i</sub>-H<sub>j</sub>...O<sub>k</sub>)</b> |                    |       |
| O1...Ow''                                                           | 2.612              | 2.552 |
| H5...Ow''                                                           | 1.754              | 1.516 |
| O7...O6                                                             | 2.651              | 2.686 |
| H8...O6                                                             | 2.166              | 2.150 |
| O7...O2'                                                            | 2.746              | 2.686 |
| H8...O2'                                                            | 2.095              | 1.821 |
| O5...Ow'                                                            | 2.675              | 2.634 |
| H7...Ow'                                                            | 1.788              | 1.623 |
| O3...O2'                                                            | 2.736              | 2.669 |
| H6...O2'                                                            | 1.931              | 1.699 |
| Ow...O4                                                             | 2.738              | 2.681 |
| Hw1...O4                                                            | 1.893              | 1.711 |
| Ow''...O7                                                           | 2.739              | 2.661 |
| Hw2''...O7                                                          | 1.913              | 1.691 |



**Table S.25.** Interatomic angles in citric acid monohydrate (in degrees).

| Angle                                                               | Exp. <sup>21</sup> | Calc.  |
|---------------------------------------------------------------------|--------------------|--------|
| <b>C-C-C</b>                                                        |                    |        |
| C1-C2-C3                                                            | 111.38             | 111.31 |
| C2-C3-C4                                                            | 109.28             | 109.11 |
| C2-C3-C6                                                            | 110.89             | 110.48 |
| C3-C4-C5                                                            | 111.38             | 112.21 |
| <b>O-C-O</b>                                                        |                    |        |
| O1-C1-O2                                                            | 123.05             | 122.88 |
| O6-C6-O5                                                            | 125.57             | 125.76 |
| O3-C5-O4                                                            | 123.88             | 124.04 |
| <b>O-C-C</b>                                                        |                    |        |
| O1-C1-C2                                                            | 112.72             | 113.59 |
| O2-C1-C2                                                            | 124.21             | 123.51 |
| O5-C6-C3                                                            | 112.28             | 112.00 |
| O6-C6-C3                                                            | 122.13             | 122.20 |
| O7-C3-C2                                                            | 108.52             | 108.43 |
| O7-C3-C4                                                            | 107.71             | 107.79 |
| O7-C3-C6                                                            | 108.38             | 109.20 |
| O3-C5-C4                                                            | 112.77             | 113.02 |
| O4-C5-C4                                                            | 123.35             | 122.93 |
| <b>C-O-H</b>                                                        |                    |        |
| C1-O1-H5                                                            | 112.43             | 110.86 |
| C6-O5-H7                                                            | 110.23             | 109.46 |
| C3-O7-H8                                                            | 108.98             | 111.42 |
| C5-O3-H6                                                            | 106.83             | 110.26 |
| <b>H-C-C</b>                                                        |                    |        |
| H1-C2-C1                                                            | 108.72             | 108.72 |
| H1-C2-C3                                                            | 109.87             | 109.39 |
| H2-C2-C1                                                            | 108.57             | 109.80 |
| H2-C2-C3                                                            | 109.38             | 108.61 |
| H3-C4-C3                                                            | 111.23             | 109.88 |
| H3-C4-C5                                                            | 106.25             | 107.24 |
| H4-C4-C3                                                            | 107.99             | 109.09 |
| H4-C4-C5                                                            | 108.52             | 111.11 |
| <b>H-C-H</b>                                                        |                    |        |
| H1-C2-H2                                                            | 108.88             | 108.97 |
| H3-C4-H4                                                            | 111.46             | 107.17 |
| <b>Water</b>                                                        |                    |        |
| Hw1-Ow-Hw2                                                          | 109.11             | 110.63 |
| <b>Hydrogen bonds (O<sub>i</sub>-H<sub>j</sub>...O<sub>k</sub>)</b> |                    |        |
| O1-H5...Ow''                                                        | 172.28             | 177.26 |
| O7-H8...O6                                                          | 120.42             | 112.25 |
| O7-H8...O2'                                                         | 140.34             | 144.05 |
| O5-H7...Ow                                                          | 174.36             | 174.69 |
| O3-H6...O2'                                                         | 163.70             | 161.89 |
| Ow-Hw1...O4                                                         | 165.51             | 163.57 |
| Ow-Hw2...O7                                                         | 161.08             | 162.72 |

**Table S.26.** Unit-cell volume and lattice parameters of citric acid monohydrate under the effect of different external isotropic pressures.

| P (GPa) | Vol. ( $\text{\AA}^3$ ) | a ( $\text{\AA}$ ) | b ( $\text{\AA}$ ) | c ( $\text{\AA}$ ) |
|---------|-------------------------|--------------------|--------------------|--------------------|
| -1.0028 | 948.1654                | 6.5209             | 9.4655             | 15.36              |
| -0.7503 | 919.8640                | 6.4205             | 9.3977             | 15.25              |
| -0.4748 | 895.2417                | 6.3196             | 9.3543             | 15.14              |
| -0.2579 | 873.4873                | 6.2162             | 9.3170             | 15.08              |
| -0.0311 | 861.9491                | 6.1856             | 9.2915             | 15.00              |
| 0.2526  | 850.6765                | 6.1496             | 9.2697             | 14.92              |
| 0.5014  | 839.8365                | 6.1069             | 9.2550             | 14.86              |
| 0.7519  | 825.6687                | 6.0460             | 9.2196             | 14.81              |
| 1.4905  | 800.2005                | 5.9533             | 9.1583             | 14.68              |
| 2.5016  | 773.0651                | 5.8529             | 9.0927             | 14.53              |
| 2.9987  | 761.7295                | 5.8092             | 9.0616             | 14.47              |
| 3.9927  | 741.3846                | 5.7291             | 8.9976             | 14.38              |
| 4.9986  | 724.3803                | 5.6610             | 8.9628             | 14.28              |
| 6.9946  | 693.9933                | 5.5265             | 8.8709             | 14.16              |
| 9.0041  | 667.3047                | 5.3923             | 8.7720             | 14.11              |
| 10.9983 | 643.8442                | 5.2550             | 8.6857             | 14.11              |

## REFERENCES

1. S. J. Clark, M. D. Segall, C. J. Pickard, P. J. Hasnip, M. I. J. Probert, K. Refson, M. C. Payne, *Z. Kristallogr.*, 2005, **220**, 567–570.
2. Materials Studio, <http://3dsbiovia.com/products/collaborative-science/biovia-materials-studio/> (accessed 10 January 2020).
3. M. C. Payne, M. P. Teter, D. C. Ailan, A. Arias, J. D. Joannopoulos, *Rev. Mod. Phys.*, 1992, **64**, 1045–1097.
4. J. P. Perdew, K. Burke, M. Ernzerhof, *Phys. Rev. Lett.*, 1996, **7**, 3865–3868.
5. S. Grimme, *J. Comput. Chem.*, 2006, **27**, 1787–1799.
6. N. Troullier, J. L. Martins, *Phys. Rev. B*, 1991, **43**, 1993–2006.
7. B. G. Pfrommer, M. Cote, S. G. Louie, M. L. Cohen, *J. Comput. Phys.*, 1997, **131**, 233–240.
8. H. J. Monkhorst, J. D. Pack, *Phys. Rev. B*, 1976, **13**, 5188–5192.
9. R. T. Downs, K. L. Bartelmehs, G. V. Gibbs, M. B. Boisen, *Am. Mineral.*, 1993, **78**, 1104–1107.
10. J. F. Nye, *Physical Properties of Crystals*, Clarendon, Oxford, 1976.
11. R. Yu, J. Zhu, H. Q. Ye, *Comput. Phys. Commun.*, 2010, **181**, 671–675.
12. F. Birch, *Phys. Rev.*, 1947, **71**, 809–824.
13. R. J. Angel, *Rev. Mineral. Geochem.*, 2000, **41**, 35–60.
14. EOSFIT 5.2 software, <http://programming.ccp14.ac.uk/ccp/webmirrors/ross-angel/crystal/software.html> (accessed 10 January 2020).
15. A. Marmier, Z. A. D. Lethbridge, R. I. Walton, C. W. Smith, S. C. Parker, K. E. Evans, *Comput. Phys. Commun.*, 2010, **181**, 2102–2115.
16. F. Mouhat, F. X. Coudert, *Phys. Rev. B*, 2014, **90**, 224104.
17. A. Schouten, J. A. Kanters, J. van Krieken, *J. Mol. Struct.*, 1994, **323**, 165–168.
18. D. Rychkov, S. Arkhipov, E. Boldyreva, *Acta Crystallogr. B*, 2016, **72**, 160–163.
19. P. Lucaioli, E. Nauha, I. Gimondi, L. S. Price, R. Guo, L. Iuzzolino, I. Singh, M. Salvalaglio, S. L. Price, N. Blagden, *CrystEngComm*, 2018, **20**, 3971–3977.
20. A. Rammohan, J. A. Kaduk, *Acta Crystallogr. B*, 2018, **74**, 239–252.
21. M. D. King, E. A. Davis, T. M. Smith, T. M. Korter, *J. Phys. Chem. A*, 2011, **115**, 11039–11044.
